# Supplementary material for: Uncertainty and Motivation to Seek Information from Pharmacy Automated Communications
Source: Preprints.org preprint supplement (doi:10.20944/preprints201804.0184.v1), 2018-04-16
Supplement: Supplementary file 1 [file supplementary]

**Table 1. Automated Telephone Calls from Pharmacies**

\*Required

R = reverse scale

### Section 1 of 3 Pre-Interaction

- |    |                                                                                                               |     |    |
|----|---------------------------------------------------------------------------------------------------------------|-----|----|
| 1. | <b>Have you ever had the occasion to use prescriptions medications?*</b><br><i>If no skip to question 41</i>  | Yes | No |
| 2. | <b>Have you ever received automated telephone calls from a pharmacy?*</b><br><i>If no skip to question 41</i> | Yes | No |

### Section 2 of 3 Post-Interaction

- |     |                                                                                                                                                  |                         |                    |                       |                     |   |     |
|-----|--------------------------------------------------------------------------------------------------------------------------------------------------|-------------------------|--------------------|-----------------------|---------------------|---|-----|
| 3.  | <b>Do you like receiving automated telephone calls from a pharmacy?*</b> <i>If no skip to question 41</i>                                        | Yes                     | No                 |                       |                     |   |     |
| 4.  | <b>How often do you receive automated telephone calls from a pharmacy?*</b> <i>Mark only one.</i>                                                | 4 times or less /year   | 5 to 11 times/year | 12 times or more/year |                     |   |     |
| 5.  | <b>How often do you contacted a pharmacy for clarification of a message received from an automated telephone message?*</b> <i>Mark only one.</i> | 4 times or less /year   | 5 to 11 times/year | 12 times or more/year |                     |   |     |
| 6.  | <b>After receiving an automated phone call from a pharmacy, which of the following best describes your experience?*</b> <i>Mark only one.</i>    | Dissatisfied            |                    |                       | Satisfied           |   |     |
|     |                                                                                                                                                  | 1                       | 2                  | 3                     | 4                   | 5 | 6 7 |
| 7.  | <b>After receiving an automated phone call from a pharmacy, which of the following best describes your experience?*</b> <i>Mark only one.</i>    | Displeased              |                    |                       | Pleased             |   |     |
|     |                                                                                                                                                  | 1                       | 2                  | 3                     | 4                   | 5 | 6 7 |
| 8.  | <b>After receiving an automated phone call from a pharmacy, which of the following best describes your experience?*</b> <i>Mark only one.</i>    | Unfavorable             |                    |                       | Favorable           |   |     |
|     |                                                                                                                                                  | 1                       | 2                  | 3                     | 4                   | 5 | 6 7 |
| 9.  | <b>After receiving an automated phone call from a pharmacy, which of the following best describes your experience?*</b> <i>Mark only one.</i>    | Unpleasant              |                    |                       | Pleasant            |   |     |
|     |                                                                                                                                                  | 1                       | 2                  | 3                     | 4                   | 5 | 6 7 |
| 10. | <b>After receiving an automated phone call from a pharmacy, which of the following best describes your experience?*</b> <i>Mark only one.</i>    | I didn't like it at all |                    |                       | I like it very much |   |     |
|     |                                                                                                                                                  | 1                       | 2                  | 3                     | 4                   | 5 | 6 7 |

Table 1. continued

|                                                                                                                                           | Not at all   |   |   |   | Very much |   |   |
|-------------------------------------------------------------------------------------------------------------------------------------------|--------------|---|---|---|-----------|---|---|
| 11. <b>After receiving automated telephone calls from a pharmacy, how relevant was the information provided?*</b> <i>Mark only one.</i>   | 1            | 2 | 3 | 4 | 5         | 6 | 7 |
| 12. <b>After receiving automated telephone calls from a pharmacy, how meaningful was the information provided?*</b> <i>Mark only one.</i> | 1            | 2 | 3 | 4 | 5         | 6 | 7 |
| 13. <b>After receiving automated telephone calls from a pharmacy, how important was the information provided?*</b> <i>Mark only one.</i>  | 1            | 2 | 3 | 4 | 5         | 6 | 7 |
| 14. <b>After receiving automated telephone calls from a pharmacy, how useful was the information provided?*</b> <i>Mark only one.</i>     | 1            | 2 | 3 | 4 | 5         | 6 | 7 |
| 15. <b>After receiving automated telephone calls from a pharmacy, how helpful was the information provided?*</b> <i>Mark only one.</i>    | 1            | 2 | 3 | 4 | 5         | 6 | 7 |
| 16. <b>To what extent do you feel that the communication received from the automated telephone message is:*</b> (R) <i>Mark only one.</i> | Untimely     |   |   |   | Timely    |   |   |
|                                                                                                                                           | 1            | 2 | 3 | 4 | 5         |   |   |
| 17. <b>To what extent do you feel that the communication received from the automated telephone message is:*</b> (R) <i>Mark only one.</i> | Inaccurate   |   |   |   | Accurate  |   |   |
|                                                                                                                                           | 1            | 2 | 3 | 4 | 5         |   |   |
| 18. <b>To what extent do you feel that the communication received from the automated telephone message is:*</b> (R) <i>Mark only one.</i> | Inadequate   |   |   |   | Adequate  |   |   |
|                                                                                                                                           | 1            | 2 | 3 | 4 | 5         |   |   |
| 19. <b>To what extent do you feel that the communication received from the automated telephone message is:*</b> (R) <i>Mark only one.</i> | Incomplete   |   |   |   | Complete  |   |   |
|                                                                                                                                           | 1            | 2 | 3 | 4 | 5         |   |   |
| 20. <b>To what extent do you feel that the communication received from the automated telephone message is:*</b> (R) <i>Mark only one.</i> | Not Credible |   |   |   | Credible  |   |   |
|                                                                                                                                           | 1            | 2 | 3 | 4 | 5         |   |   |

Table 1. continued

|     |                                                                                                                                | Definitely false    |   |   |   | Definitely true  |   |
|-----|--------------------------------------------------------------------------------------------------------------------------------|---------------------|---|---|---|------------------|---|
| 21. | <b>I am always courteous even to people who are disagreeable.* (R) Mark only one.</b>                                          | 1                   | 2 | 3 | 4 | 5                |   |
| 22. | <b>There have been occasions when I took advantage of someone.* Mark only one.</b>                                             | 1                   | 2 | 3 | 4 | 5                |   |
| 23. | <b>I sometimes try to get even rather than forgive and forget.* Mark only one.</b>                                             | 1                   | 2 | 3 | 4 | 5                |   |
| 24. | <b>I sometimes feel resentful when I don't get my way.* Mark only one.</b>                                                     | 1                   | 2 | 3 | 4 | 5                |   |
| 25. | <b>No matter who I'm talking to, I'm always a good listener.* (R) Mark only one.</b>                                           | 1                   | 2 | 3 | 4 | 5                |   |
|     |                                                                                                                                | Completely disagree |   |   |   | Completely agree |   |
| 26. | <b>I don't like situations that are uncertain.* Mark only one.</b>                                                             | 1                   | 2 | 3 | 4 | 5                | 6 |
| 27. | <b>I dislike questions which could be answered in many ways.* Mark only one.</b>                                               | 1                   | 2 | 3 | 4 | 5                | 6 |
| 28. | <b>I find that a well ordered life with regular hours suit my temperament.* Mark only one.</b>                                 | 1                   | 2 | 3 | 4 | 5                | 6 |
| 29. | <b>I feel uncomfortable when I don't understand the reason why an event occurred in my life.* Mark only one.</b>               | 1                   | 2 | 3 | 4 | 5                | 6 |
| 30. | <b>I feel irritated when one person disagrees with what everyone else in a group believes.* Mark only one.</b>                 | 1                   | 2 | 3 | 4 | 5                | 6 |
| 31. | <b>I don't like to go into a situation without knowing what I can expect from it.* Mark only one.</b>                          | 1                   | 2 | 3 | 4 | 5                | 6 |
| 32. | <b>When I have made a decision, I feel relieved.* Mark only one.</b>                                                           | 1                   | 2 | 3 | 4 | 5                | 6 |
| 33. | <b>When I am confronted with a problem, I'm dying to reach a solution quickly.* Mark only one.</b>                             | 1                   | 2 | 3 | 4 | 5                | 6 |
| 34. | <b>I would quickly become impatient and irritated if I would not find a solution to a problem immediately.* Mark only one.</b> | 1                   | 2 | 3 | 4 | 5                | 6 |
| 35. | <b>I don't like to be with people who are capable of unexpected actions.* Mark only one.</b>                                   | 1                   | 2 | 3 | 4 | 5                | 6 |
| 36. | <b>I dislike it when a person's statement could mean many different things.* Mark only one.</b>                                | 1                   | 2 | 3 | 4 | 5                | 6 |
| 37. | <b>I find that establishing a consistent routine enables me to enjoy life more.* Mark only one.</b>                            | 1                   | 2 | 3 | 4 | 5                | 6 |
| 38. | <b>I enjoy having a clear and structured mode of life.* Mark only one.</b>                                                     | 1                   | 2 | 3 | 4 | 5                | 6 |
| 39. | <b>I do not usually consult many different opinions before forming my own view.* Mark only one.</b>                            | 1                   | 2 | 3 | 4 | 5                | 6 |
| 40. | <b>I dislike unpredictable situations.* Mark only one.</b>                                                                     | 1                   | 2 | 3 | 4 | 5                | 6 |

Table 1. continued

### Section 3 of 3 Post-Interaction

41. **Sex\*** *Mark only one.*  
Female  
Male
42. **Age\*** *Mark only one.*  
18-24 years  
25-29 years  
30-34 years  
35-39 years  
40-44 years  
45-49 years  
50-54 years  
55-59 years  
60-64 years  
65 years or over
43. **Education\*** *Mark only one.*  
Less than high school  
High school graduate or General Equivalency Diploma,  
G.E.D.  
Trade school or other post secondary education  
Some College  
Associate's degree  
Bachelor's degree  
Graduate/Professional degree
44. **Marital Status\*** *Mark only one.*  
Single/never married  
Married  
Divorced/separated  
Widow  
Domestic partner  
Member of an unmarried couple
45. **Ethnicity or Origin \*** *Check all that apply.*  
African-American/Black  
American Indian, Eskimo or Aleut  
Asian Pacific Islander  
Caucasian/White  
Hispanic or Latino  
Native Hawaiian or other Pacific Islander  
Multiracial  
Prefer not to answer  
Other: \_\_\_\_\_
46. **Annual Household Income\*** *Mark only one.*  
Less than \$15K  
\$15 K to less than \$25 K  
\$25 K to less than \$35 K  
\$35 K to less than \$50 K  
\$50 K to less than \$75 K  
\$75 K to less than \$100 K  
\$100 K to less than \$150 K  
\$150 K to less than \$200 K  
\$200 K or higher
